# Supplementary material
Source: MDPI journal article supplement (https://www.mdpi.com/1424-8247/16/1/57)
Supplement: s1 [file s1]

## ***Supplementary Material***

### **1 Supplemental material and methods**

Precise details of the PSM.

Propensity scores were the conditional probabilities of performing a specific exposure (spironolactone users versus non-users) given a set of baseline measurement covariates. Propensity scores were estimated using a non-parsimonious multivariate logistic regression model with spironolactone users as the dependent variable and all baseline characteristics listed in Table 1 as covariates. Matching was performed using a 1:1 matching protocol without replacement (greedy matching algorithm) with a caliper width equal to 0.2 of the standard deviation of the propensity score logit.

### **2 Supplementary Figures and Tables**

## 2.1 Supplementary Figures

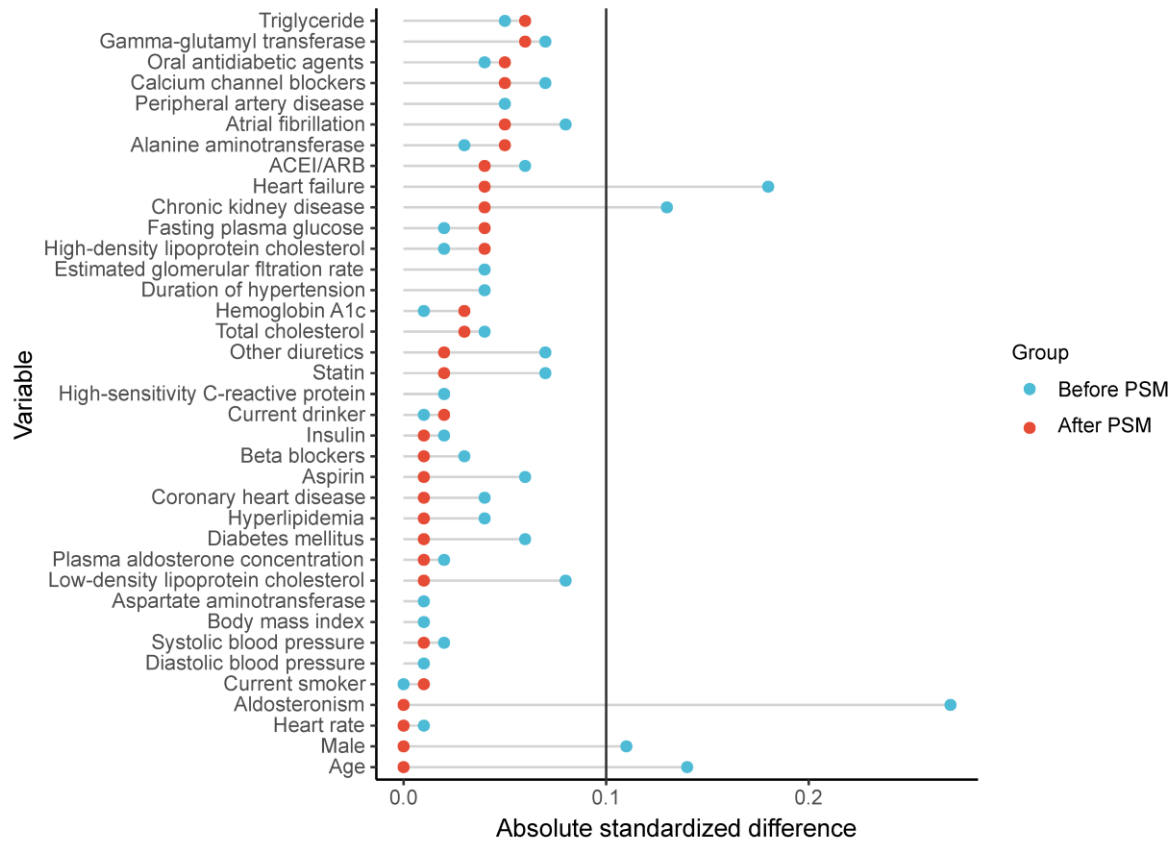

**Figure S1.** Absolute standardized difference of covariates before and after propensity score matching.

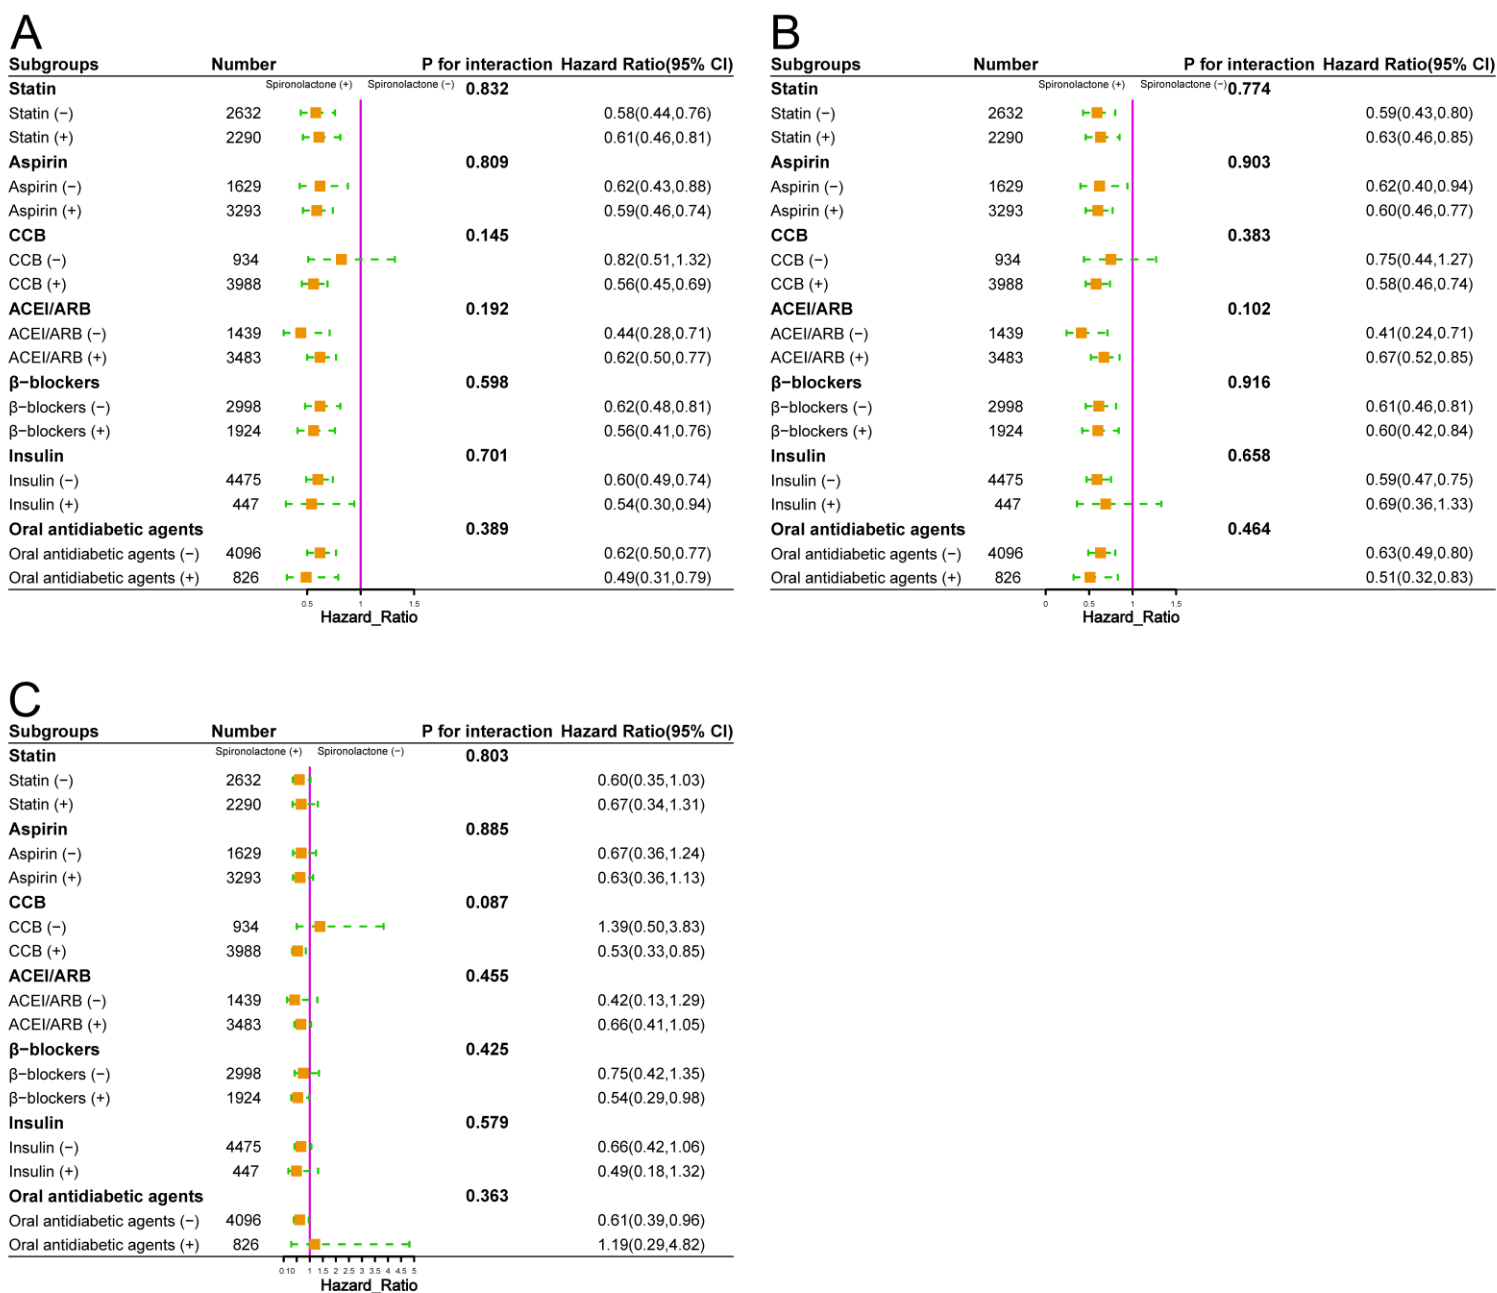

**Figure S2.** Association between the use of spironolactone and outcomes in other subgroups. (A) total stroke, (B) ischemic stroke, (C) hemorrhagic stroke.

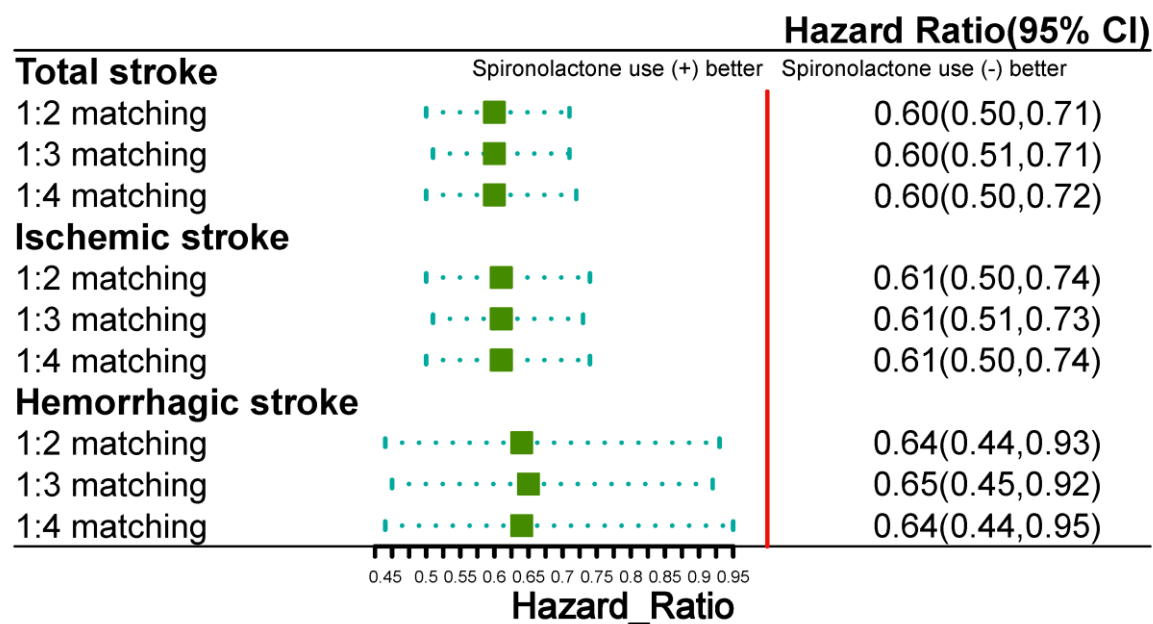

**Figure S3.** Forest plot showing results of sensitivity analyses based on different analysis strategy.

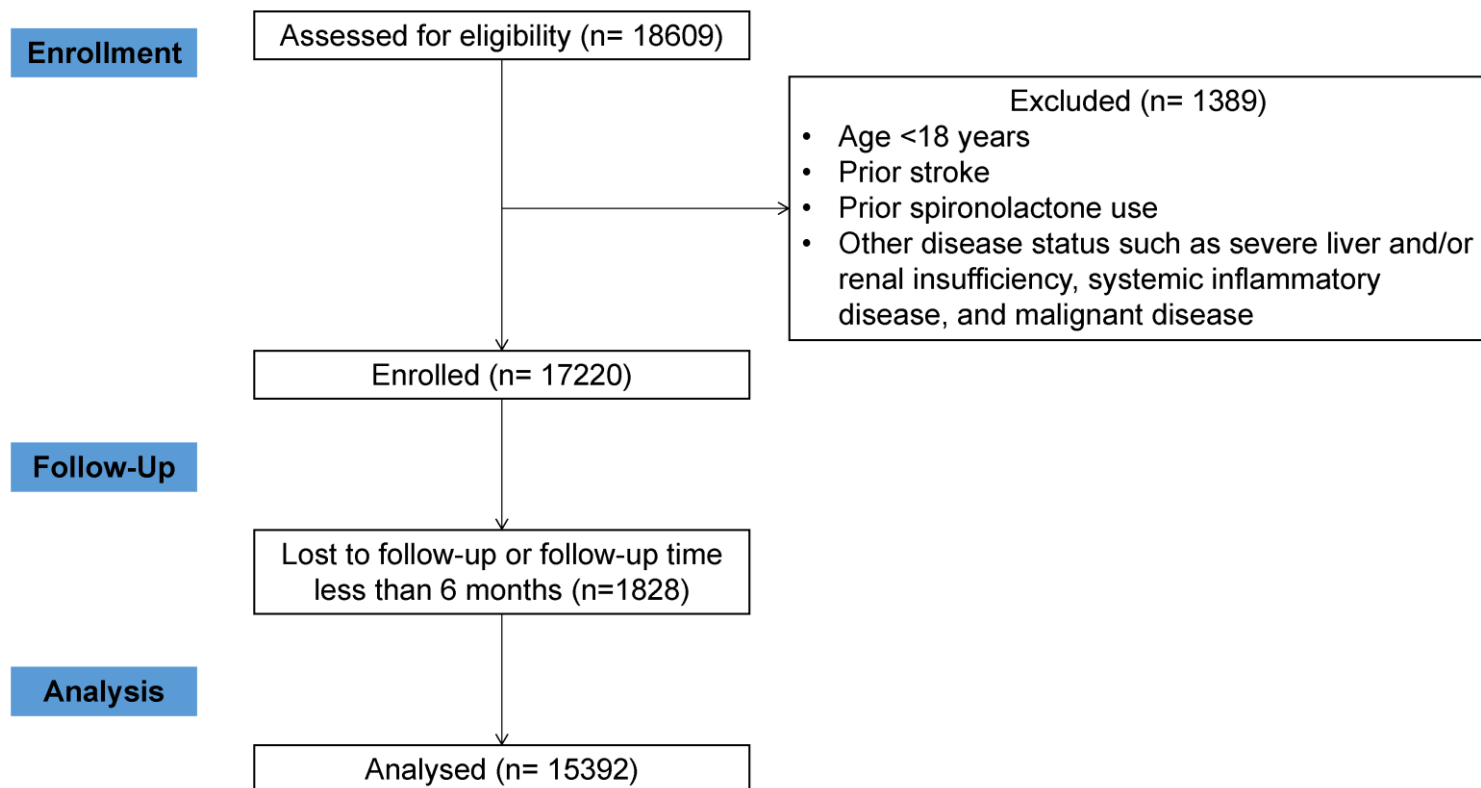

**Figure S4.** STROBE participant flow diagram.

## 2.2 Supplementary Tables

**Table S1.** Sensitivity analyses by excluding subjects with age more than 80 years in propensity score-matched cohort.

|                                       | Nonusers         | Spironolactone users | P value |
|---------------------------------------|------------------|----------------------|---------|
| <b>Total stroke</b>                   |                  |                      |         |
| Unadjusted HR (95% CI)                | 1.00 (reference) | 0.58 (0.48, 0.71)    | <0.001  |
| Multivariable adjusted HR (95% CI)    | 1.00 (reference) | 0.61 (0.50, 0.75)    | <0.001  |
| Propensity score-adjusted HR (95% CI) | 1.00 (reference) | 0.59 (0.48, 0.72)    | <0.001  |
| <b>Ischemic stroke</b>                |                  |                      |         |
| Unadjusted HR (95% CI)                | 1.00 (reference) | 0.59 (0.47, 0.73)    | <0.001  |
| Multivariable adjusted HR (95% CI)    | 1.00 (reference) | 0.62 (0.50, 0.78)    | 0.001   |
| Propensity score-adjusted HR (95% CI) | 1.00 (reference) | 0.59 (0.47, 0.74)    | <0.001  |
| <b>Hemorrhagic stroke</b>             |                  |                      |         |
| Unadjusted HR (95% CI)                | 1.00 (reference) | 0.64 (0.42, 0.97)    | 0.036   |
| Multivariable adjusted HR (95% CI)    | 1.00 (reference) | 0.64 (0.42, 0.97)    | 0.035   |
| Propensity score-adjusted HR (95% CI) | 1.00 (reference) | 0.64 (0.42, 0.98)    | 0.040   |

**Table S2.** Sensitivity analysis excluding outcome events within the first year of follow-up in propensity score-matched cohort.

|                                       | Nonuser group    | User group        | P value |
|---------------------------------------|------------------|-------------------|---------|
| <b>Total stroke</b>                   |                  |                   |         |
| Unadjusted HR (95% CI)                | 1.00 (reference) | 0.64 (0.52, 0.79) | <0.001  |
| Multivariable adjusted HR (95% CI)    | 1.00 (reference) | 0.65 (0.53, 0.81) | <0.001  |
| Propensity score-adjusted HR (95% CI) | 1.00 (reference) | 0.65 (0.52, 0.80) | <0.001  |
| <b>Types of stroke</b>                |                  |                   |         |
| <b>Ischemic stroke</b>                |                  |                   |         |
| Unadjusted HR (95% CI)                | 1.00 (reference) | 0.65 (0.52, 0.82) | <0.001  |
| Multivariable adjusted HR (95% CI)    | 1.00 (reference) | 0.67 (0.53, 0.84) | 0.001   |
| Propensity score-adjusted HR (95% CI) | 1.00 (reference) | 0.66 (0.52, 0.83) | <0.001  |
| <b>Hemorrhagic stroke</b>             |                  |                   |         |
| Unadjusted HR (95% CI)                | 1.00 (reference) | 0.70 (0.45, 1.09) | 0.116   |
| Multivariable adjusted HR (95% CI)    | 1.00 (reference) | 0.71 (0.46, 1.10) | 0.121   |
| Propensity score-adjusted HR (95% CI) | 1.00 (reference) | 0.71 (0.46, 1.10) | 0.124   |

In the unadjusted model only treatment was included as covariate. In the multivariable model 35 additional covariates were included. Using the same covariates, the individual propensity score were calculated.

HR, hazard ratio; CI, confidence interval.

**Table S3.** Competing risk models for the association of spironolactone use with the risk of stroke in propensity score-matched cohort.

|                                          | Nonusers         | Spironolactone users | P value |
|------------------------------------------|------------------|----------------------|---------|
| <b>Total stroke</b>                      |                  |                      |         |
| Subdistribution HR <sup>†</sup> (95% CI) | 1.00 (reference) | 0.60 (0.49, 0.74)    | <0.001  |
| <b>Types of stroke</b>                   |                  |                      |         |
| <b>Ischemic stroke</b>                   |                  |                      |         |
| Subdistribution HR <sup>†</sup> (95% CI) | 1.00 (reference) | 0.62 (0.49, 0.79)    | <0.001  |
| <b>Hemorrhagic stroke</b>                |                  |                      |         |
| Subdistribution HR <sup>†</sup> (95% CI) | 1.00 (reference) | 0.61 (0.39, 0.96)    | 0.034   |

<sup>†</sup>Adjusted Fine & Gray subdistribution hazard model accounting for competing risk of death attributable to other causes.

**Table S4.** Incidence of hyperkalemia events in patients in the spironolactone-use and non-use groups after propensity score matching.

| Safety outcome                         | Unadjusted HR     | Multivariable adjusted HR | Propensity score-adjusted HR |
|----------------------------------------|-------------------|---------------------------|------------------------------|
| Nonuser vs User                        |                   |                           |                              |
| Nonuser group                          | 1.00 (reference)  | 1.00 (reference)          | 1.00 (reference)             |
| User group                             | 1.21 (0.79, 1.87) | 1.22 (0.79, 1.88)         | 1.23 (0.80, 1.90)            |
| Average daily dose of spironolactone   |                   |                           |                              |
| Nonuser group                          | 1.00 (reference)  | 1.00 (reference)          | 1.00 (reference)             |
| ≤20mg/day                              | 0.77 (0.41, 1.46) | 0.77 (0.41, 1.46)         | 0.79 (0.42, 1.50)            |
| 40mg/day                               | 1.28 (0.72, 2.26) | 1.29 (0.73, 2.29)         | 1.27 (0.72, 2.25)            |
| ≥60mg/day                              | 1.82 (1.03, 3.19) | 1.83 (1.04, 3.22)         | 1.87 (1.07, 3.28)            |
| Duration of spironolactone consumption |                   |                           |                              |
| Nonuser group                          | 1.00 (reference)  | 1.00 (reference)          | 1.00 (reference)             |
| ≥0.5, <1 years                         | 1.57 (0.69, 3.54) | 1.56 (0.69, 3.53)         | 1.37 (0.60, 3.14)            |
| ≥1, <5 years                           | 1.57 (0.91, 2.71) | 1.60 (0.93, 2.76)         | 1.60 (0.93, 2.76)            |
| ≥5 years                               | 0.94 (0.55, 1.60) | 0.94 (0.55, 1.61)         | 0.98 (0.57, 1.68)            |

**Table S5.** List of medications included in the study.

| Drug class                                                                | Drug name                                                                                                                                                                                                                  |
|---------------------------------------------------------------------------|----------------------------------------------------------------------------------------------------------------------------------------------------------------------------------------------------------------------------|
| Aspirin                                                                   | Aspirin                                                                                                                                                                                                                    |
| Beta-blocker                                                              | Atenolol, bisoprolol, carvedilol, metoprolol, propranolol                                                                                                                                                                  |
| Angiotensin-converting enzyme inhibitors or angiotensin receptor blockers | Azilsartan, candesartan, captopril, enalapril, fosinopril, irbesartan, losartan, olmesartan, ramipril, telmisartan, valsartan                                                                                              |
| Calcium channel blockers                                                  | Amlodipine, diltiazem, felodipine, lercanidipine, nifedipine, verapamil                                                                                                                                                    |
| Spironolactone                                                            | Spironolactone                                                                                                                                                                                                             |
| Other diuretics                                                           | Acetazolamide, amiloride, benzyl hydrochlorothiazide, bumetanide, furosemide, hydrochlorothiazide, indapamide                                                                                                              |
| Statin                                                                    | Atorvastatin, fluvastatin, pitavastatin, rosuvastatin, simvastatin                                                                                                                                                         |
| Oral antidiabetic agents                                                  | Metformin, glipizide, gliclazide, glimepiride, glyburide, alogliptin, linagliptin, sitagliptin, vidagliptin, saxagliptin, acarbose, nateglinide, meglitinide, repaglinde, pioglitzone, dulaglutide, exenatide, liraglutide |
| Insulin                                                                   | Rapid, short, intermediate and long-acting insulins                                                                                                                                                                        |
